# Supplementary material for: Vascular transcriptome profiling identifies Sphingosine kinase 1 as a modulator of angiotensin II-induced vascular dysfunction
Source: PubMed Central journal article supplement (PMC5343497; doi:10.1038/srep44131), 2017-03-09
Supplement: srep44131-s1.pdf [file srep44131-s1.pdf]

## Supplementary Information

# **Vascular transcriptome profiling identifies *Sphingosine kinase 1* as a modulator of angiotensin II-induced vascular dysfunction**

Mateusz Siedlinski, Ryszard Nosalski, Piotr Szczepaniak, Agnieszka Ludwig-Gałęzowska,  
Tomasz Mikołajczyk, Magdalena Filip, Grzegorz Osmenda, Grzegorz Wilk, Michał Nowak,  
Paweł Wołkow, and Tomasz J. Guzik

**Supplementary Table 1:** Top 20 gene sets significantly enriched in hypertension in thoracic aorta and mesenteric arteries

| Thoracic aorta                              |                             |             | Mesenteric arteries                                  |                             |             |
|---------------------------------------------|-----------------------------|-------------|------------------------------------------------------|-----------------------------|-------------|
| Gene set                                    | Normalized enrichment score | FDR q-value | Gene set                                             | Normalized enrichment score | FDR q-value |
| Skeletal Development                        | 2.058                       | 0.011       | Regulation Of Cell Migration                         | 1.748                       | 0.672       |
| Angiogenesis                                | 2.033                       | 0.008       | Viral Infectious Cycle                               | 1.747                       | 0.337       |
| Vasculature Development                     | 2.025                       | 0.006       | Regulation Of Translational Initiation               | 1.702                       | 0.369       |
| Anatomical Structure Formation              | 2.016                       | 0.005       | Cellular Defense Response                            | 1.686                       | 0.331       |
| Cell-Cell Adhesion                          | 1.984                       | 0.008       | Viral Reproductive Process                           | 1.685                       | 0.266       |
| Organ Development                           | 1.964                       | 0.009       | Skeletal Muscle Development                          | 1.677                       | 0.239       |
| Positive Regulation Of Response To Stimulus | 1.934                       | 0.012       | Mitotic Cell Cycle                                   | 1.656                       | 0.256       |
| Immune Response                             | 1.929                       | 0.011       | Viral Reproduction                                   | 1.6                         | 0.379       |
| Multi Organism Process                      | 1.920                       | 0.012       | Reproduction                                         | 1.549                       | 0.528       |
| Regulation Of Response To Stimulus          | 1.905                       | 0.012       | Mitosis                                              | 1.546                       | 0.492       |
| Organ Morphogenesis                         | 1.889                       | 0.014       | Regulation Of Cellular Protein Metabolic Process     | 1.536                       | 0.487       |
| Tissue Development                          | 1.888                       | 0.013       | Protein Amino Acid Phosphorylation                   | 1.535                       | 0.449       |
| Organic Acid Metabolic Process              | 1.887                       | 0.012       | Phosphorylation                                      | 1.534                       | 0.417       |
| System Development                          | 1.883                       | 0.012       | Regulation Of Protein Metabolic Process              | 1.512                       | 0.464       |
| Proteolysis                                 | 1.877                       | 0.013       | Regulation Of Phosphorylation                        | 1.503                       | 0.464       |
| Carboxylic Acid Metabolic Process           | 1.868                       | 0.013       | M Phase Of Mitotic Cell Cycle                        | 1.502                       | 0.439       |
| Ectoderm Development                        | 1.850                       | 0.015       | Microtubule Cytoskeleton Organization And Biogenesis | 1.497                       | 0.433       |
| Regulation Of Cell Proliferation            | 1.839                       | 0.017       | Regulation Of Translation                            | 1.495                       | 0.414       |
| Positive Regulation Of Cell Proliferation   | 1.833                       | 0.017       | Regulation Of Multicellular Organismal Process       | 1.494                       | 0.395       |
| Epidermis Development                       | 1.831                       | 0.016       | Angiogenesis                                         | 1.479                       | 0.421       |

**Supplementary Table 2:** Expression stability of candidate constitutive genes across all 23 samples studied, calculated using NormFinder v. 0.953 software

| <b>Gene</b>       | <b>Stability value</b> |
|-------------------|------------------------|
| <i>Abl1</i>       | 0.005                  |
| <i>Actb</i>       | 0.036                  |
| <i>B2m</i>        | 0.021                  |
| <i>Casc3</i>      | 0.013                  |
| <i>Cdkn1a</i>     | 0.031                  |
| <i>Cdkn1b</i>     | 0.009                  |
| <i>Eif2b1</i>     | 0.008                  |
| <i>Elf1</i>       | 0.010                  |
| <i>Gadd45a</i>    | 0.016                  |
| <i>Gapdh</i>      | 0.011                  |
| <i>Gapdhs</i>     | 0.003                  |
| <i>Gusb</i>       | 0.019                  |
| <i>Hmbs</i>       | 0.002                  |
| <i>Hprt1</i>      | 0.017                  |
| <i>Ipo8</i>       | 0.011                  |
| <i>Mrpl19</i>     | 0.003                  |
| <i>mtDNA_ATP6</i> | 0.010                  |
| <i>Pes1</i>       | 0.012                  |
| <i>Pgk1</i>       | 0.007                  |
| <i>Polr2a</i>     | 0.008                  |
| <i>Pop4</i>       | 0.007                  |
| <i>Ppia</i>       | 0.007                  |
| <i>Psmc4</i>      | 0.009                  |
| <i>Pum1</i>       | 0.011                  |
| <i>Rn18s</i>      | 0.030                  |
| <i>Rpl30</i>      | 0.016                  |
| <i>Rpl37</i>      | 0.006                  |
| <i>Rplp2</i>      | 0.012                  |
| <i>Tbp</i>        | 0.005                  |
| <i>Tfrc</i>       | 0.018                  |
| <i>Top1</i>       | 0.007                  |
| <i>Ywhaz</i>      | 0.009                  |

**Supplementary table 3:** Clinical characteristics of enrolled patients (n=82)

|                                          |                     |
|------------------------------------------|---------------------|
| Sex, n (%) males                         | 33 (40.2)           |
| Age, mean (SD)                           | 57.5 (4.0)          |
| Ex-/current smokers, n (%)               | 27 (32.9)/22 (26.8) |
| SBP in mmHg, mean (SD)                   | 130.4 (21.2)        |
| DBP in mmHg, mean (SD)                   | 81.7 (10.6)         |
| ASP in mmHg, mean (SD)                   | 125.3 (17.5)        |
| Serum S1P level in $\mu$ M, median (IQR) | 20.1 (16.4-23.4)    |
| lnRHI index, mean (SD)                   | 0.71 (0.27)         |
| Alx in %, mean (SD)                      | 33.1 (10.4)         |
| average IMT in mm, mean (SD)             | 0.88 (0.13)         |
| PWV in m/s, mean (SD)                    | 9.0 (2.4)           |

RHI=Reactive Hyperemia Index, Alx=Augmentation Index, ASP= Aortic Systolic Pressure, S1P=sphingosine-1-phosphate, IMT=intima-media thickness, PWV= pulse wave velocity

**Supplementary figure 1:** Western Blot analysis of Sphk1 in mesenteric arteries, aortas and hearts of hypertensive and normotensive mice.

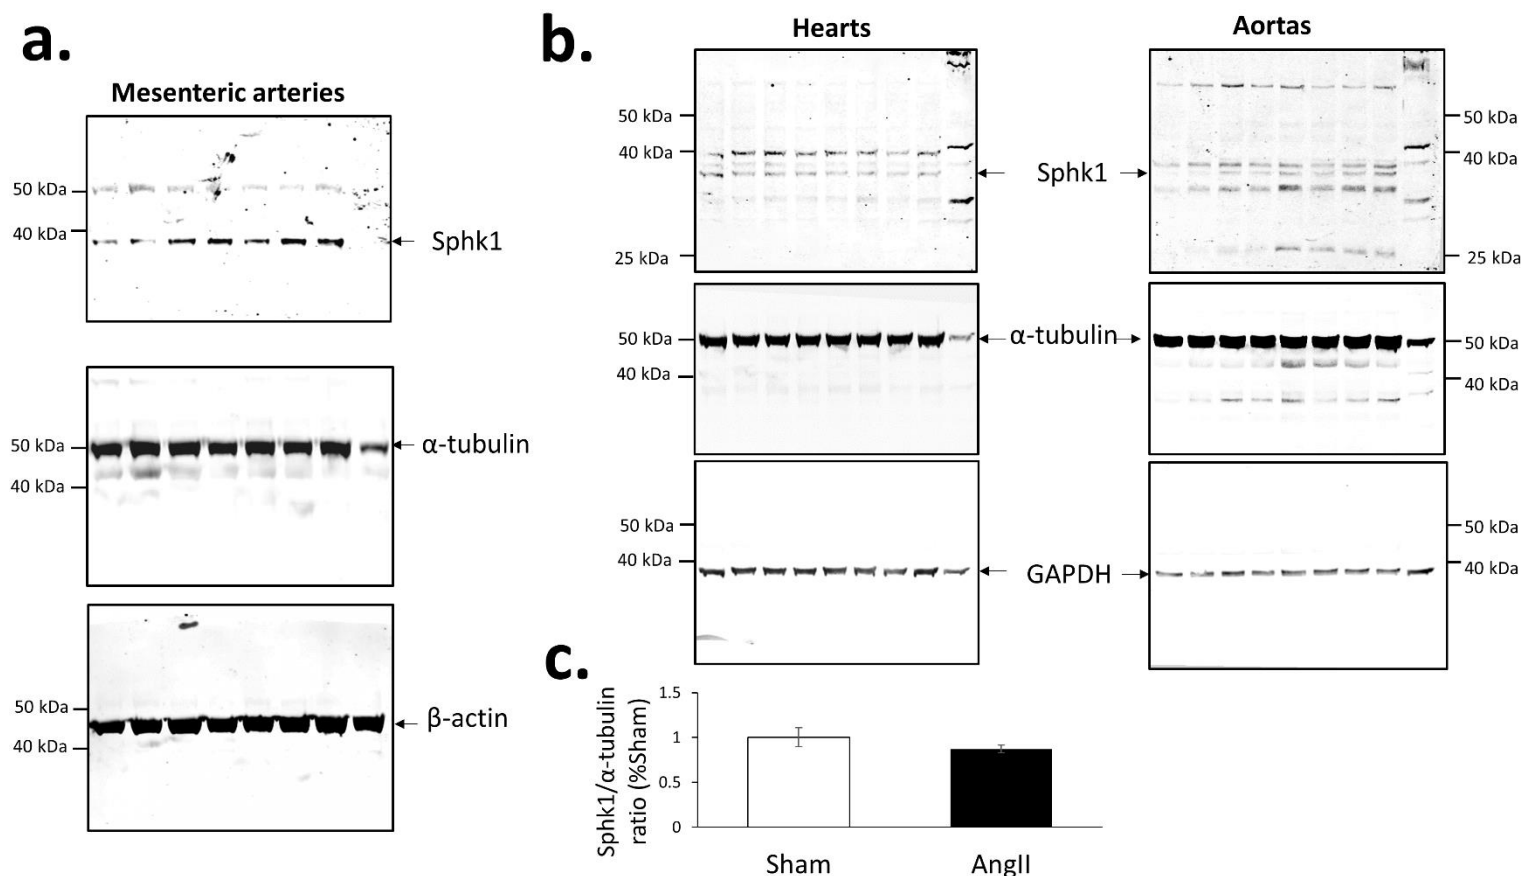

(a) Mesenteric arteries (from the left: 3x Sham, 4x AngII, 1x *Sphk1*<sup>-/-</sup>) were used to assess the expression of Sphk1 using Western Blot method with a use of  $\alpha$ -tubulin as a loading control. In order to confirm a specificity of the band detected and to ensure a proper loading of *Sphk1*<sup>-/-</sup> tissue, membrane was reprobred using antibody against  $\beta$ -actin. (b) In an independent experiment, heart and aortic tissues (from the left (4x Sham, 4x AngII, 1x *Sphk1*<sup>-/-</sup> heart)) were used to assess the expression of Sphk1 using Western Blot method with a use of  $\alpha$ -tubulin as a loading control. In order to confirm a specificity of the band detected and to ensure a proper loading of *Sphk1*<sup>-/-</sup> tissue, membrane was reprobred using antibody against GAPDH. In both analyses (a, b), lack of band in the *Sphk1*<sup>-/-</sup>-derived tissue was used to identify Sphk1-specific band. (c) Densitometric analysis of Sphk1 expression in hearts of Sham vs. AngII-infused mice ( $p=0.38$ ).

**Supplementary figure 2:** Effects of chronic S1P infusion on vascular function *in vivo*

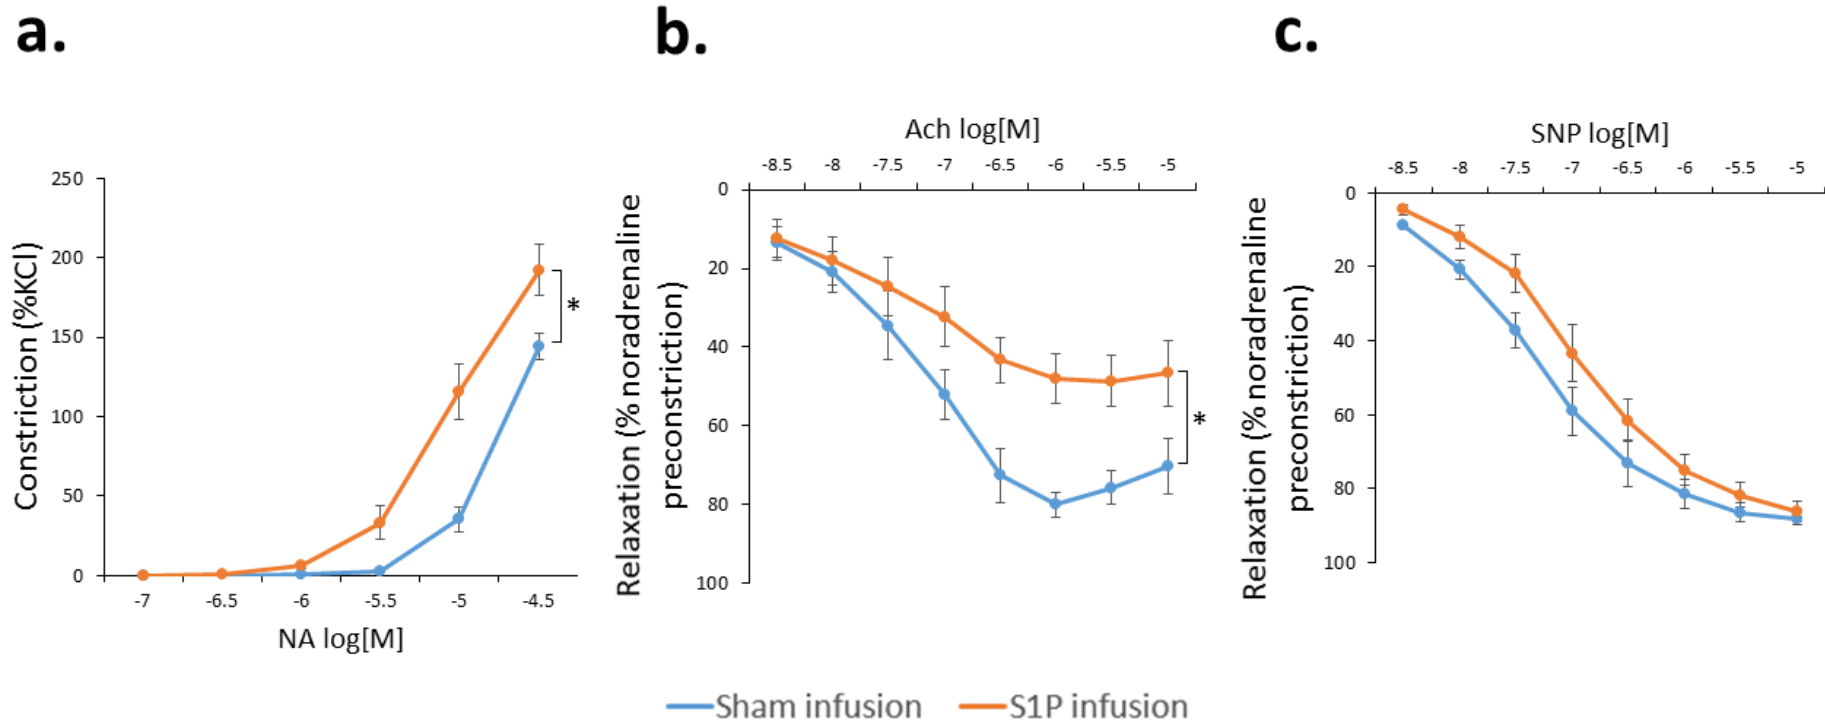

Effects of chronic S1P infusion on vascular function were tested in normotensive WT mice receiving sphingosine-1-phosphate (S1P) or Sham solution in osmotic minipump for 12 days at a 300 nmol/kg/day dose (n=5/group). Vascular function studies were performed using mesenteric arteries and 610M myograph (DMT, Denmark). Vascular contraction in response to noradrenaline (a) as well as vasorelaxation in response to Ach (b) or SNP (c) is presented. Prior vasorelaxation experiment arteries were precontracted using concentration of noradrenaline required to achieve 90% of maximal contraction as determined by testing increasing doses of this vasoconstrictor.

WT=wild type; Ach=acetylcholine; NA=noradrenaline; SNP=sodium nitroprusside, [M]=molar concentration

\*p<0.05

**Supplementary figure 3: Characteristics of hearts from WT and *Sphk1*<sup>-/-</sup> mice**

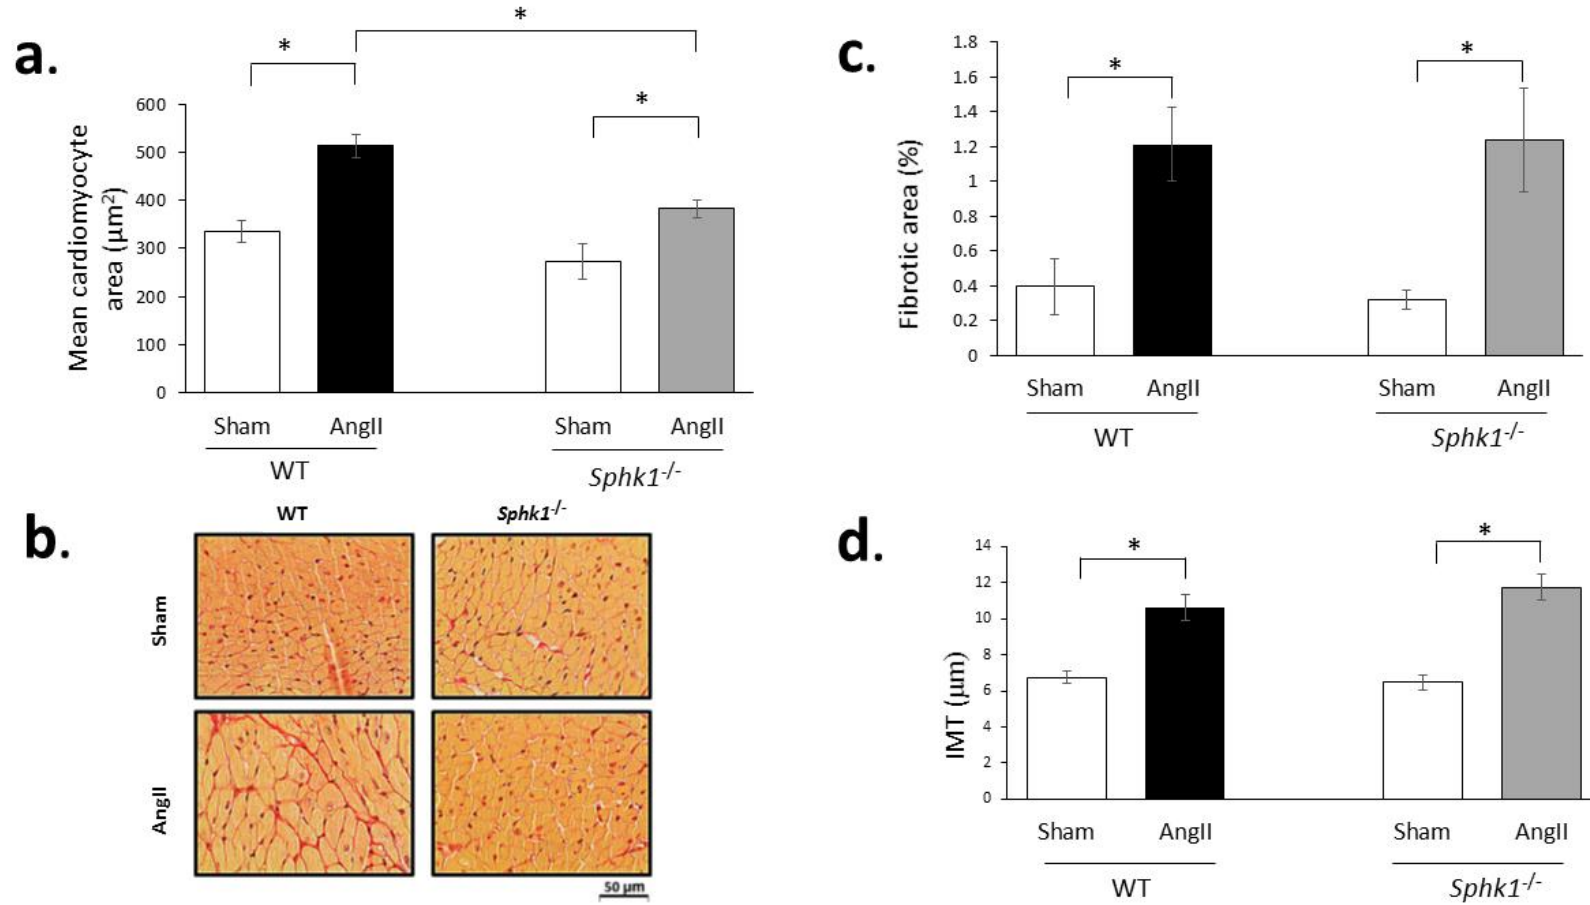

Crosssectional sections of hearts (n=5-8/group) were used to quantify average cardiomyocyte size using ImageJ software (a). Representative sections are presented (b). Similarly, Masson's trichrome-stained sections were used to quantify the percentage of hearts fibrotic area using ImageJ (c). IMT of cardiac arteries (n=1-2/heart) found in the left ventricle with a diameter of approximately 100 $\mu\text{m}$  was quantified (n=5-8/group).

\*p<0.05

**Supplementary figure 4:** SNP-induced relaxation of mesenteric arteries and thoracic aortas from WT and *Sphk1*<sup>-/-</sup> mice and dose-dependent impact of JTE-013 on aortic contraction *ex vivo*

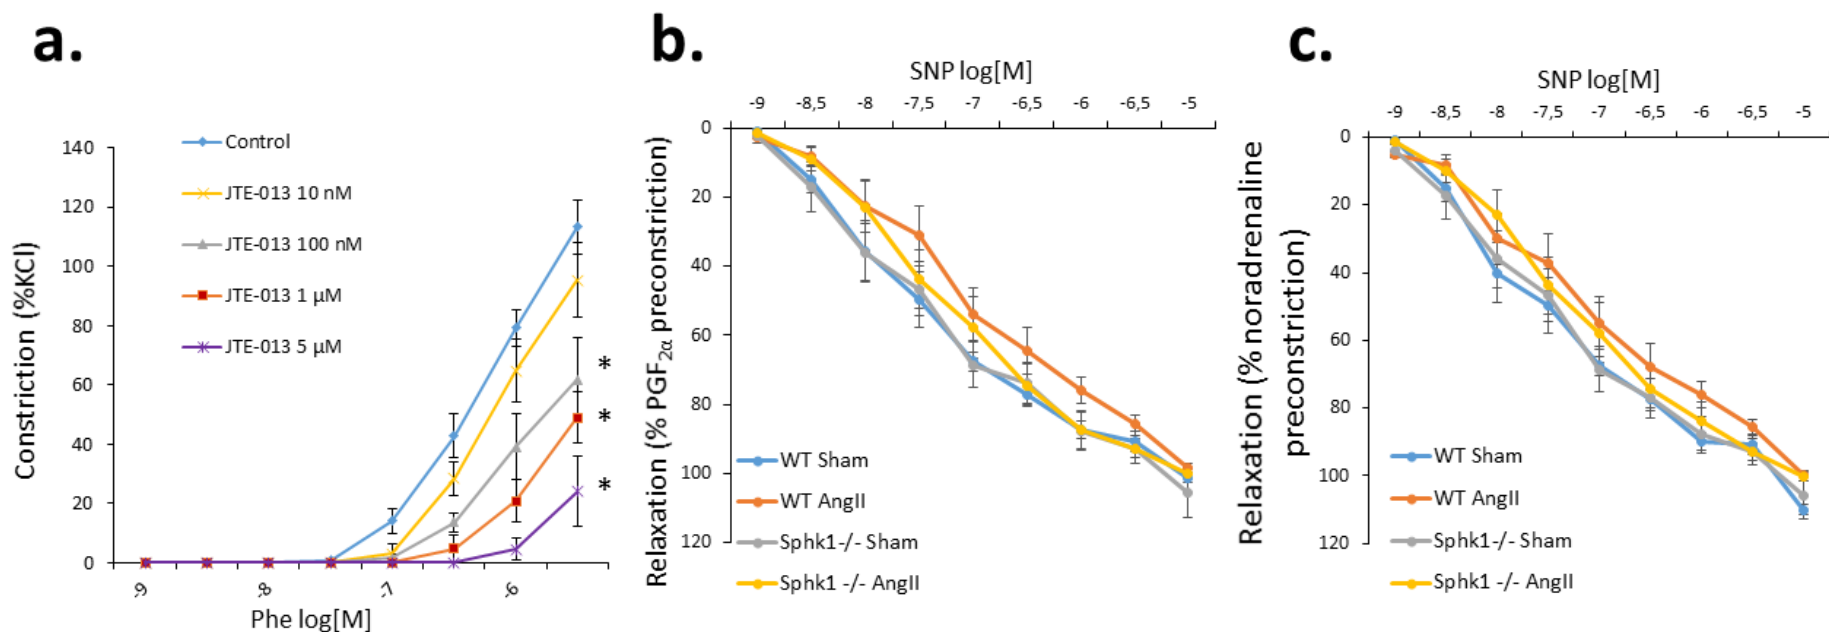

Tissue organ bath experiments were performed using 750 TOBS (a,b) or 610M (c) instruments (DMT Denmark). Phenylephrine-induced constriction of WT aortic rings preincubated in different concentration of S1PR2 antagonist JTE-013 is presented (a). SNP-induced relaxation of aortic rings (b) and mesenteric arteries (c) of hypertensive and normotensive WT and *Sphk1*<sup>-/-</sup> mice are shown.

SNP=sodium nitroprusside, Phe=phenylephrine; PGF<sub>2α</sub> =Prostaglandin F<sub>2α</sub>

\*p<0.05 as compared to control



**Supplementary figure 5: Effects of AngII infusion and *Sphk1* deletion on superoxide anion production and *CYBB* expression**

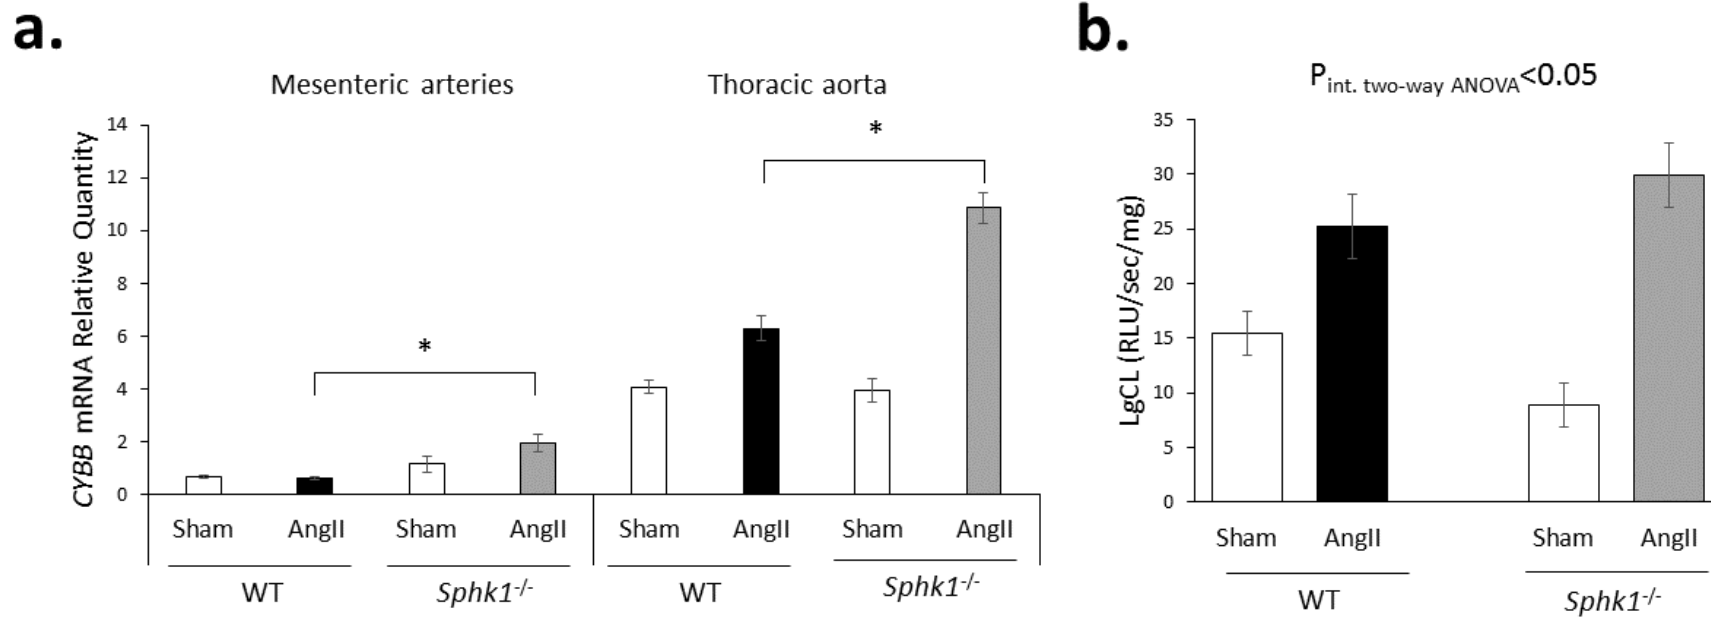

(a) Expression of *Cybb* mRNA was analyzed by real-time PCR and was normalized to the housekeeping *Tbp* gene in vascular compartments studied. *Cybb* mRNA quantity is depicted relative to the expression observed in the mesenteric arteries of Sham WT group (n=6-8/group). (b) Aortic segments were incubated in 2 ml Krebs-HEPES buffer containing 5 $\mu$ M lucigenin using Berthold FB12 single tube luminometer, modified to maintain 37°C temperature. Superoxide production was quantified as relative light units (RLU) per second per mg of a dry vessel tissue, n=6/group;

\*p<0.05

Cybb=cytochrome b-245 beta chain; Tbp= TATA box binding protein; LgCL=Lucigenin-dependent chemiluminescence
